# Supplementary material for: The role of bridging ligands in determining DNA-binding ability and cross-linking patterns of dinuclear platinum(ii) antitumour complexes
Source: Royal Society of Chemistry journal article supplement (doi:10.1039/b913236h), 2009-01-01
Supplement: b913236h.pdf [file b913236h.pdf]

## Supporting Information

# The Role of Bridging Ligands in Determining DNA-binding ability and Cross-linking Patterns of Dinuclear Platinum (II) Antitumor Complexes

Jianhui Zhu, Miaoxin Lin, Damin Fan, Ziyi Wu, Yuncong Chen, Junfeng Zhang, Yi Lu and Zijian Guo

### Synthesis of {[*cis*-Pt(NH<sub>3</sub>)<sub>2</sub>Cl]<sub>2</sub>L<sub>2</sub>}(NO<sub>3</sub>)<sub>2</sub> (**2**)

The *cis*-[Pt(NH<sub>3</sub>)<sub>2</sub>Cl(DMF)](NO<sub>3</sub>), which was used as starting material to prepare the complex **2**, was obtained by stirring AgNO<sub>3</sub> and *cis*-[Pt(NH<sub>3</sub>)<sub>2</sub>Cl<sub>2</sub>] in dimethylformamide (DMF) overnight and filtering off AgCl precipitate, as previously described.<sup>1</sup> The DMF solution of linker L<sub>2</sub> (30.00 mg, 0.22 mmol) was added dropwise to the solution of *cis*-[Pt(NH<sub>3</sub>)<sub>2</sub>Cl(DMF)](NO<sub>3</sub>) (0.47 mmol) with stirring, then the resultant mixture was stirred overnight in the dark at room temperature. After precipitation, filtration, condensation and vacuum dry, light yellow solids of complex **2** were obtained (yield 85 mg, 43%).

The purity of complex **2** was characterized by <sup>1</sup>H NMR and ESI-MS. In the <sup>1</sup>H NMR spectrum (Fig. S1A), only one set of signals of methylene and phenyl (3.91 ppm, -CH<sub>2</sub>; 7.60 ppm, -Ph-H) was observed, shifting significantly to lower field compared to those of free L<sub>2</sub>, which suggested both amine groups of L<sub>2</sub> bind to Pt(II) equivalently (Fig. S1B). In the ESI-MS spectrum, a major peak was observed at *m/z* 332.1, which corresponds to the positively doubly charged species {[Pt(NH<sub>3</sub>)<sub>2</sub>Cl]<sub>2</sub>L<sub>2</sub>}<sup>2+</sup>. The isotopic distribution pattern of this peak matched perfectly with the simulated one.

Elemental analysis of complex **2**, found (calcd.) for Pt<sub>2</sub>C<sub>8</sub>H<sub>24</sub>Cl<sub>2</sub>N<sub>8</sub>O<sub>6</sub> (%): C, 12.17 (12.03); H, 3.04 (3.16); N, 14.20 (14.53).

### Computational Methods

The starting geometry for each optimization was generated with the Q-Chem electronic structure calculation suite of programs.<sup>2</sup> Bond lengths of 2.31 Å for Pt-Cl<sup>3</sup> and 2.03 Å for Pt-amine<sup>4</sup> were used. All N-Pt-N angles were started at 90°. The electrostatic potential used in the RESP charge fitting<sup>5</sup> was calculated at the HF/6-31G\*\* level using the Gaussian 03 program.<sup>6</sup> Computational results of the geometry-optimized structures of complexes 1 and 2 are shown in the Fig. S2.

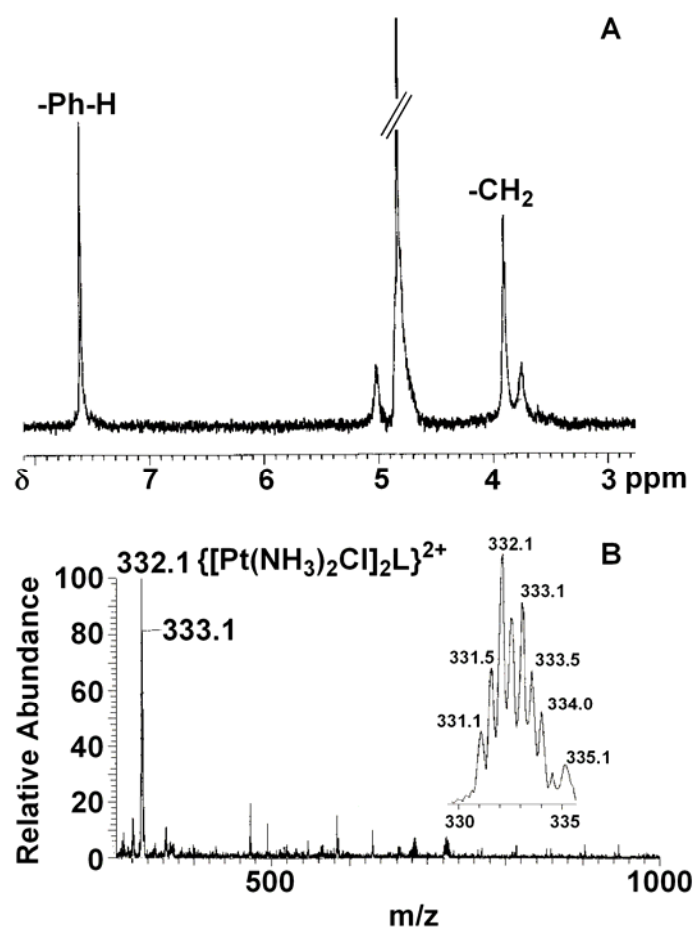

**Fig. S1** The <sup>1</sup>H NMR (A, D<sub>2</sub>O, 298 K) and electrospray mass spectrometry (B, methanol, positive mode) spectra of complex 2.

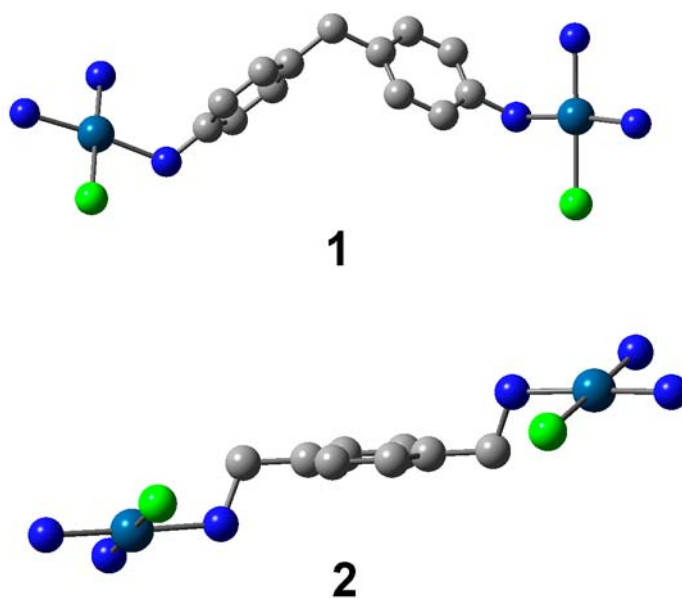

**Fig. S2** Calculated structures of complexes **1** and **2**. Hydrogen atoms are omitted for clarity.

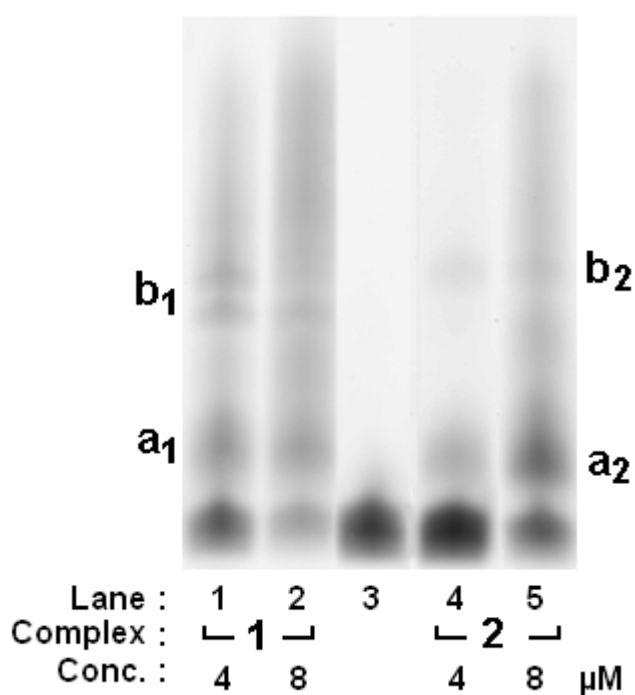

**Fig. S3** Fluorescence image of a 20% polyacrylamide denaturing gel of DNA adducts of complex **1** and **2** induced in duplex **N2**. Lane 1 and 2: complex **1**; lane 3, unplatinated duplex **N2**; lane 3 and 4: complex **2**.

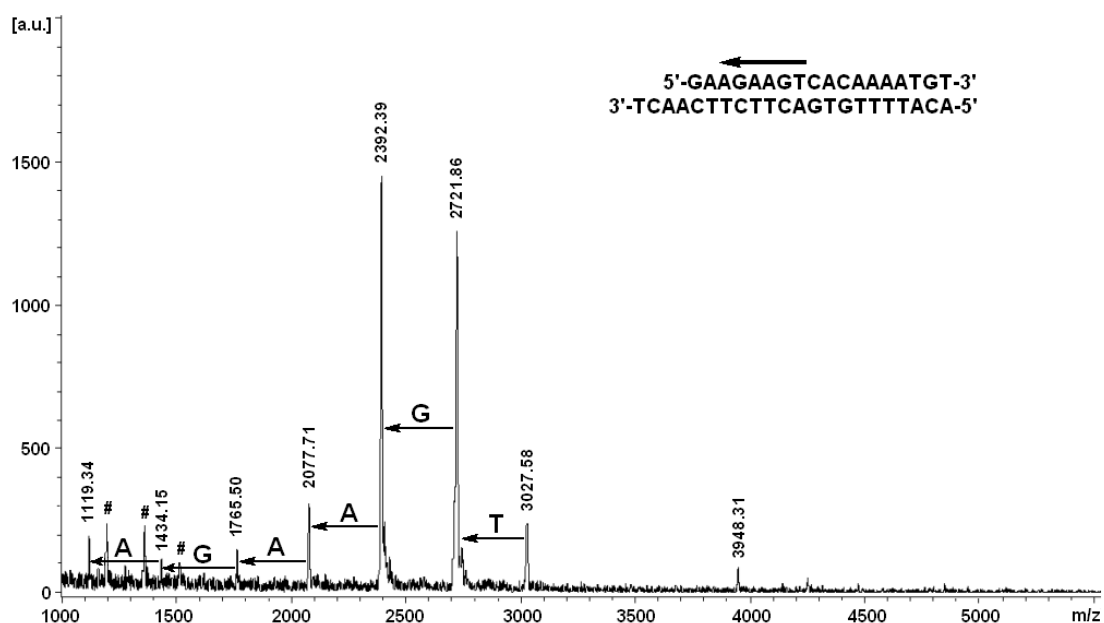

**Fig. S4** MALDI-TOF mass spectra of Exo III digests of duplex **N3**. The arrows indicate the cleavage direction and location along the sequence. The peaks corresponding to doubly charged ions are marked with #.

## References

- 1 D. M. Fan, X. L. Yang, X. Y. Wang, S. C. Zhang, J. F. Mao, J. Ding, L. P. Lin, Z. J. Guo, *J. Biol. Inorg. Chem.*, 2007, **12**, 655–665.
- 2 Y. Shao, L. F. Molnar, Y. Jung, J. Kussmann, C. Ochsenfeld, S. T. Brown, A. T. B. Gilbert, *et al.*, *Phys. Chem. Chem. Phys.* 2006, **8**, 3172-3191.
- 3 E. Tornaghi, W. Andreoni, P. Carloni, J. Hutter, M. Parrinello, *Chem. Phys. Lett.*, 1995, **246**, 469–474.
- 4 V. Brabec, J. Kasparkova, O. Vrana, O. Novakova, J. W. Cox, Y. Qu, N. Farrell, *Biochemistry*, 1999, **38**, 6781–6790.
- 5 C. I. Bayly, P. Cieplak, W. D. Cornell, P. A. Kollman, *J. Phys. Chem.* 1993, **97**, 10269–10280.
- 6 M. J. Frisch, G. W. Trucks, H. B. Schlegel, G. E. Scuseria, M. A. Robb, J. R. Cheeseman, J. A. Montgomery, T. Vreven, *et al.*, GAUSSIAN 03, Revision D.01, Gaussian, Inc, Wallingford, CT, 2004.
